# Supplementary material for: Child Maltreatment and associated Sociodemographic factors among Children affected by HIV/AIDS in Ghana: A Multi-Informant Perspective
Source: Research Square preprint supplement (doi:10.21203/rs.3.rs-368841/v1), 2021-04-13
Supplement: Supplementary file 1 [file a60e65a87c4c138562d054c7.docx]

**Table 1: Socio-demographic Characteristics of the Participants**

|  | Non-orphaned and vulnerable children (n = 100) |  | | | P value  (t-test/chi-square) |
| --- | --- | --- | --- | --- | --- |
| AIDS-orphaned vulnerable children (n = 74) | Other-orphans (n = 67) | Children with HIV/AIDS infected parent/caregiver (n = 50) |
| Age | 11.53 (2.683) | 13.78 (2.624) | 13.09 (2.673) | 14.84 (2.324) | F = 21.131**c** |
| Gender: Girls  Boys | 52  48 | 50  50 | 50.7  49.3 | 48  52 | n. s. |
| Ethnicity: Dangme/Krobo | 63.0% | 59.5% | 73.1% | 56.0% | X = 40.051**c** |
| Household size | 4.98 (0.995) | 3.73 (0.969) | 4.27 (1.226) | 3.96 (1.068) | F = 22.604**c** |
| No. of changes in residence | 1.35 (1.336) | 2.76 (1.524) | 3.09 (1.685) | 1.72 (1.471) | F = 23.844**c** |
| No. of siblings | 1.21 (0.946) | 1.95 (0.935) | 2.22 (1.277) | 2.44 (1.198) | F = 19.807**c** |
| Location where child lives: urban | 50.0% | 60.8% | 59.7% | 58.0% | n. s. |
| Age child first bereaved |  | 6.27 (4.339) | 8.81 (3.456) |  |  |
| Parental educational level: > Junior Secondary |  |  |  |  |  |
| Parental unemployment | 7.0% | 9.5% | 9.0% | 38.0% | X = 39.695 **c** |
| Parental Loss: Mother  Father  Both | -  -  - | 33.8%  37.8%  28.4% | 34.3%  41.8%  23.9% | -  -  - | n. s. |
| Religion: Christianity | 69.0% | 48.7% | 44.8% | 56.0% | X = 36.271 **c** |

**aDenotes significance at the 0.05 level, b denotes significance at the 0.01 level, c denotes significance at the .001 level**

**Table 2: Comparisons of Scale scores across respondents using Paired Sample Statistics (n = 286)**

| Source | Children self-report | Informant report | t sig. | Inter-informant correlation  r sig. |
| --- | --- | --- | --- | --- |
| Domestic Violence  Mean  SD | 3.37  1.45 | 2.10  1.40 | 11.046 .001 | .066 n. s. |
| Neglect  Mean  SD | 4.29  1.66 | 3.69  2.04 | 4.054 .001 | .140 .01 |
| Psychological Abuse  Mean  SD | 3.40  1.68 | 8.31  2.80 | -27.119 .001 | .121 .05 |
| Physical Abuse  Mean  SD | 2.67  1.65 | 12.14  4.75 | -8.914 .001 | .011 n. s. |
|  |  |  |  |  |

| Source | Comparison group of children  (n = 100)  [1] | Orphaned and vulnerable children | | | F |  |  |
| --- | --- | --- | --- | --- | --- | --- | --- |
| AIDS-orphaned children  (n = 74)  [2] | Other-orphans  (n = 67)  [3] | Children with HIV/AIDS-infected parents (n = 50)  [4] | Partial η2 | Observed Power |
|  |  |  |  |  |  |  |  |
| *Domestic Violence (M, SD) | 2.76 (1.27) | 3.89 (1.42) | 3.19 (1.44) | 4.08 (1.24) | 15.585 **c** | .140 | 1 |
| *Neglect (M, SD) | 3.85 (1.49) | 4.57 (1.79) | 4.22 (1.60) | 4.82 (1.71) | 4.920 **b** | .049 | .91 |
|  |  |  |  |  |  |  |  |
| *Physical Abuse (M, SD) | 2.32 (1.66) | 3.08 (1.55) | 2.63 (1.58) | 2.80 (1.74) | 3.242 **a** | .033 | .74 |
|  |  |  |  |  |  |  |  |
| *Psychological Abuse (M, SD) | 2.08 (1.30) | 3.91 (1.410 | 4.15 (1.45) | 4.28 (1.42) | 47.019 **c** | .330 | 1 |
|  |  |  |  |  |  |  |  |

**Table 3: MANCOVA Results showing Orphanhood Group differences on Child Maltreatment**

***Adjusted for sociodemographic variables (age, gender, household size, number of siblings, changes in residence and current educational status)**

**a Denotes significance at the 0.05 level, b denotes significance at the 0.01 level, c denotes significance at the .001 level**
